# Supplementary material for: Binding and removal of octahedral, tetrahedral, square planar and linear anions in water by means of activated carbon functionalized with a pyrimidine-based anion receptor
Source: Royal Society of Chemistry journal article supplement (doi:10.1039/c4ra11916a), 2014-01-01
Supplement: c4ra11916a1.pdf [file c4ra11916a1.pdf]

## Supplementary Information

### **Binding and removal of octahedral, tetrahedral, square planar and linear anions in water by means of activated carbon functionalized with a pyrimidine-based anion receptor**

Paloma Arranz Mascaros,<sup>a</sup> Carla Bazzicalupi,<sup>b</sup> Antonio Bianchi,<sup>b\*</sup> Claudia Giorgi,<sup>b</sup> M. Luz Godino Salido,<sup>a</sup> Maria Dolores Gutiérrez Valero,<sup>a</sup> Rafael López Garzon,<sup>a\*</sup> Matteo Savastano<sup>b</sup>

<sup>a</sup> Department of Inorganic and Organic Chemistry, University of Jaén 23071, Jaén, Spain. E-mail: rlopez@ujaen.es

<sup>b</sup> Department of Chemistry “Ugo Schiff”, University of Florence, Via della Lastruccia 3, 50019, Sesto Fiorentino, Italy. E-mail: antonio.bianchi@unifi.it

## Contents

|                                                                                                                                                                                                                                                                                                                                                                                                   |    |
|---------------------------------------------------------------------------------------------------------------------------------------------------------------------------------------------------------------------------------------------------------------------------------------------------------------------------------------------------------------------------------------------------|----|
| <b>Figure S1.</b> Selectivity diagrams calculate for the systems HL/L1/S <sub>2</sub> O <sub>3</sub> <sup>2-</sup> , HL/L1/Co(CN) <sub>6</sub> <sup>3-</sup> , HL/L1/Au(S <sub>2</sub> O <sub>3</sub> ) <sub>2</sub> <sup>3-</sup> and HL/L1/Pt(CN) <sub>4</sub> <sup>2-</sup> .                                                                                                                  | S3 |
| <b>Figure S2.</b> Conditional stability constants calculated as a function of pH for the systems HL/L1/Au(S <sub>2</sub> O <sub>3</sub> ) <sub>2</sub> <sup>3-</sup> , HL/L1/S <sub>2</sub> O <sub>3</sub> <sup>2-</sup> , HL/L1/Fe(CN) <sub>6</sub> <sup>4-</sup> , HL/L1/Co(CN) <sub>6</sub> <sup>3-</sup> , HL/L1/SeO <sub>4</sub> <sup>2-</sup> and HL/L1/Pt(CN) <sub>4</sub> <sup>2-</sup> . | S4 |
| <b>Table S1.</b> Overall equilibrium constants for the formation of anion complexes with HL determined by means of potentiometric measurements in 0.1M Me <sub>4</sub> NCl aqueous solution at 298.1 K.                                                                                                                                                                                           | S5 |
| <b>Table S2.</b> Overall equilibrium constants for the formation of anion complexes with tren (L1) determined by means of potentiometric measurements in 0.1M Me <sub>4</sub> NCl aqueous solution at 298.1 K.                                                                                                                                                                                    | S6 |

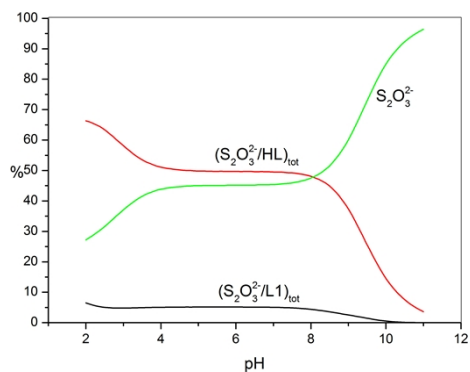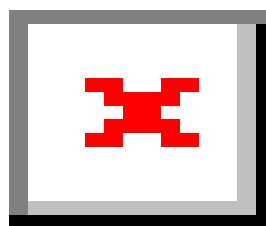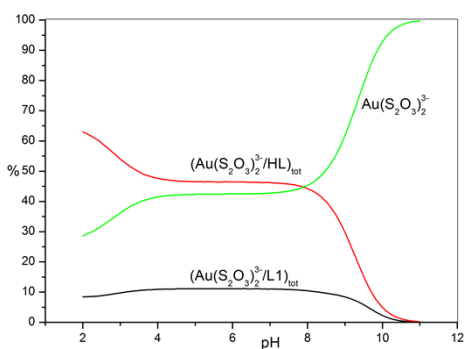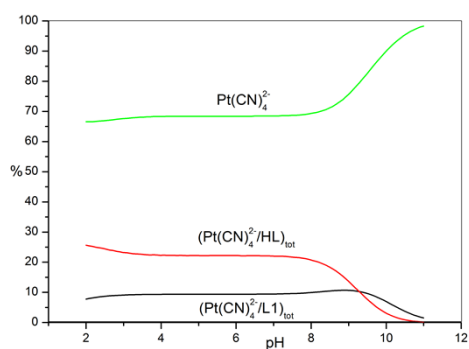

**Figure S1.** Selectivity diagrams calculated for the systems HL/L1/S<sub>2</sub>O<sub>3</sub><sup>2-</sup>, HL/L1/Co(CN)<sub>6</sub><sup>3-</sup>, HL/L1/Au(S<sub>2</sub>O<sub>3</sub>)<sub>2</sub><sup>3-</sup> and HL/L1/Pt(CN)<sub>4</sub><sup>2-</sup>, showing the percentage of anion bound to each ligand as a function of pH. All reagents 1×10<sup>-3</sup> M.

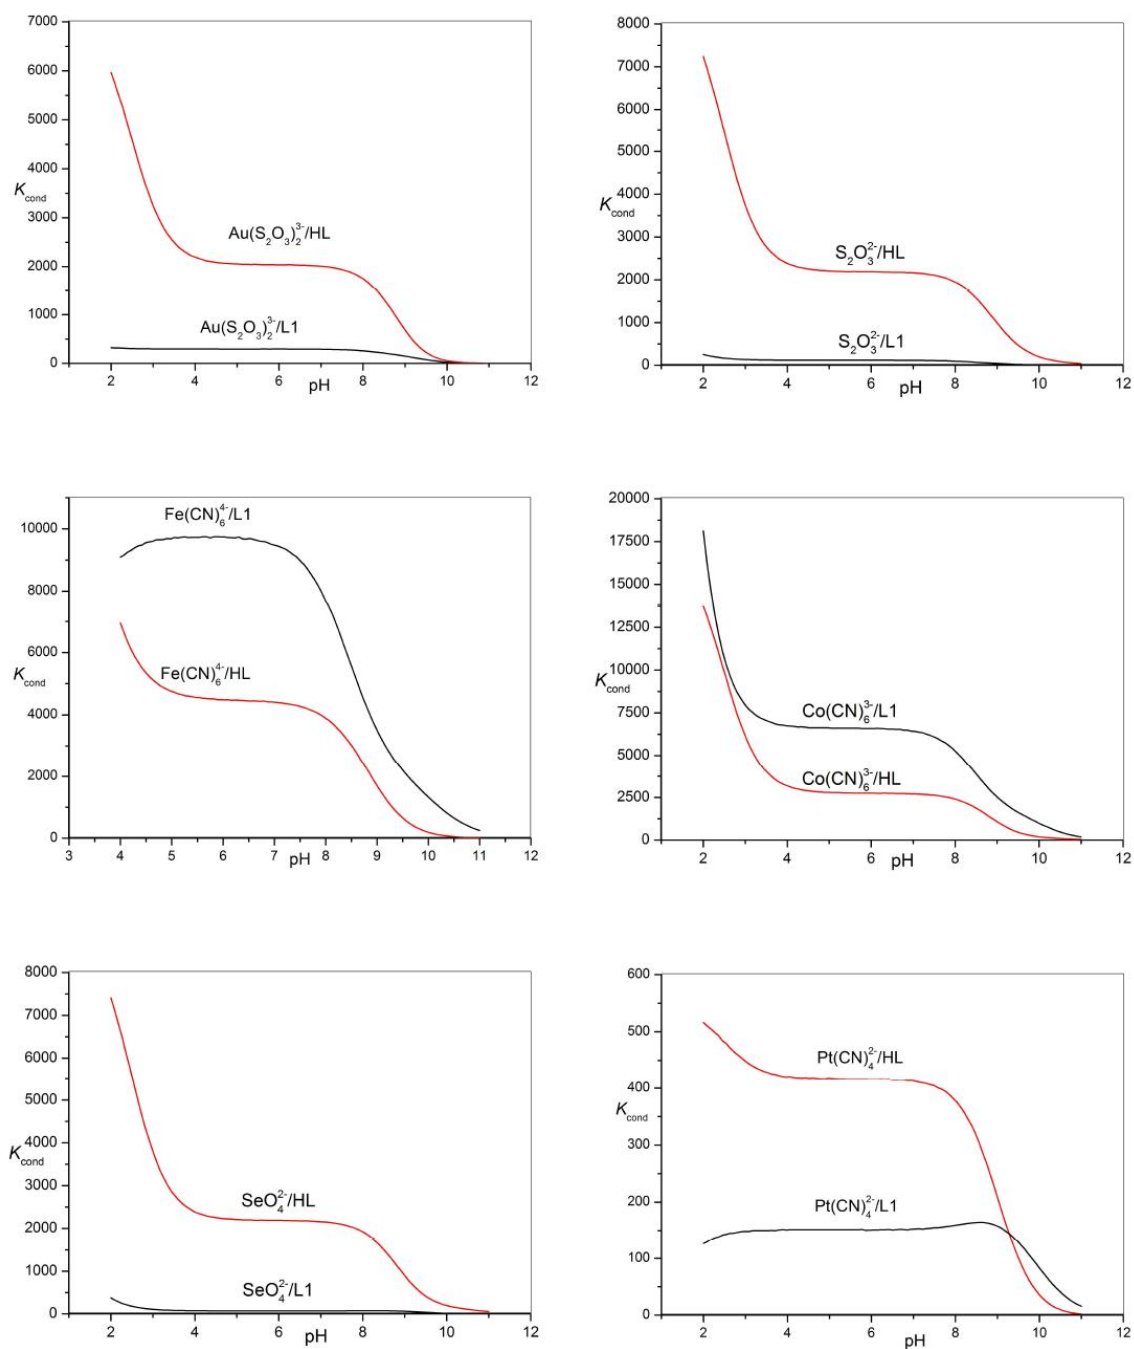

**Figure S2.** Conditional stability constants calculated as a function of pH for the systems HL/L1/ $\text{Au}(\text{S}_2\text{O}_3)_2^{3-}$ , HL/L1/ $\text{S}_2\text{O}_3^{2-}$ , HL/L1/ $\text{Fe}(\text{CN})_6^{4-}$ , HL/L1/ $\text{Co}(\text{CN})_6^{3-}$ , systems HL/L1/ $\text{SeO}_4^{2-}$  and HL/L1/ $\text{Pt}(\text{CN})_4^{2-}$ .

**Table S1.** Overall equilibrium constants for the formation of anion complexes with HL determined by means of potentiometric measurements in 0.1M Me<sub>4</sub>NCl aqueous solution at 298.1 K.

| Equilibria                                                                                                                         | log $\beta$           |
|------------------------------------------------------------------------------------------------------------------------------------|-----------------------|
| $2\text{H}^+ + \text{L}^- + \text{Fe}(\text{CN})_6^{4-} = [\text{H}_2\text{L}(\text{Fe}(\text{CN})_6)]^{3-}$                       | 23.55(6) <sup>a</sup> |
| $3\text{H}^+ + \text{L}^- + \text{Fe}(\text{CN})_6^{4-} = [\text{H}_3\text{L}(\text{Fe}(\text{CN})_6)]^{2-}$                       | 33.04(5)              |
| $4\text{H}^+ + \text{L}^- + \text{Fe}(\text{CN})_6^{4-} = [\text{H}_4\text{L}(\text{Fe}(\text{CN})_6)]^-$                          | 36.56(7)              |
| $5\text{H}^+ + \text{L}^- + \text{Fe}(\text{CN})_6^{4-} = [\text{H}_5\text{L}(\text{Fe}(\text{CN})_6)]$                            | 39.40(6)              |
| $2\text{H}^+ + \text{L}^- + \text{Au}(\text{S}_2\text{O}_3)_2^{3-} = [\text{H}_2\text{L}(\text{Au}(\text{S}_2\text{O}_3)_2)]^{2-}$ | 22.97(6)              |
| $3\text{H}^+ + \text{L}^- + \text{Au}(\text{S}_2\text{O}_3)_2^{3-} = [\text{H}_3\text{L}(\text{Au}(\text{S}_2\text{O}_3)_2)]^-$    | 32.70(4)              |
| $4\text{H}^+ + \text{L}^- + \text{Au}(\text{S}_2\text{O}_3)_2^{3-} = [\text{H}_4\text{L}(\text{Au}(\text{S}_2\text{O}_3)_2)]$      | 35.37(5)              |

<sup>a</sup> Values in parentheses are standard deviations on the last significant figures.

**Table S2.** Overall equilibrium constants for the formation of anion complexes with tren (L1) determined by means of potentiometric measurements in 0.1M Me<sub>4</sub>NCl aqueous solution at 298.1 K.

|                                                                                                                                 | log $\beta$           |
|---------------------------------------------------------------------------------------------------------------------------------|-----------------------|
| Equilibria                                                                                                                      |                       |
| $2\text{H}^+ + \text{L1} + \text{S}_2\text{O}_3^{2-} = [\text{H}_2\text{L1}(\text{S}_2\text{O}_3)]$                             | 21.23(6) <sup>a</sup> |
| $3\text{H}^+ + \text{L1} + \text{S}_2\text{O}_3^{2-} = [\text{H}_3\text{L1}(\text{S}_2\text{O}_3)]^+$                           | 30.09(5)              |
| $4\text{H}^+ + \text{L1} + \text{S}_2\text{O}_3^{2-} = [\text{H}_4\text{L1}(\text{S}_2\text{O}_3)]^{2+}$                        | 32.28(5)              |
|                                                                                                                                 |                       |
| $2\text{H}^+ + \text{L1} + \text{SeO}_4^{2-} = [\text{H}_2\text{L1}(\text{SeO}_4)]$                                             | 21.20(4)              |
| $3\text{H}^+ + \text{L1} + \text{SeO}_4^{2-} = [\text{H}_3\text{L1}(\text{SeO}_4)]^+$                                           | 29.94(4)              |
| $4\text{H}^+ + \text{L1} + \text{SeO}_4^{2-} = [\text{H}_4\text{L1}(\text{SeO}_4)]^{2+}$                                        | 32.59(4)              |
|                                                                                                                                 |                       |
| $\text{H}^+ + \text{L1} + \text{Pt}(\text{CN})_4^{2-} = [\text{HL1}(\text{Pt}(\text{CN})_4)]^-$                                 | 12.20(6)              |
| $2\text{H}^+ + \text{L1} + \text{Pt}(\text{CN})_4^{2-} = [\text{H}_2\text{L1}(\text{Pt}(\text{CN})_4)]$                         | 21.88(5)              |
| $3\text{H}^+ + \text{L1} + \text{Pt}(\text{CN})_4^{2-} = [\text{H}_3\text{L1}(\text{Pt}(\text{CN})_4)]^+$                       | 30.19(5)              |
|                                                                                                                                 |                       |
| $\text{H}^+ + \text{L1} + \text{Co}(\text{CN})_6^{3-} = [\text{HL1}(\text{Co}(\text{CN})_6)]^{2-}$                              | 13.28(7)              |
| $2\text{H}^+ + \text{L1} + \text{Co}(\text{CN})_6^{3-} = [\text{H}_2\text{L1}(\text{Co}(\text{CN})_6)]^-$                       | 22.92(5)              |
| $3\text{H}^+ + \text{L1} + \text{Co}(\text{CN})_6^{3-} = [\text{H}_3\text{L1}(\text{Co}(\text{CN})_6)]$                         | 31.83(5)              |
| $4\text{H}^+ + \text{L1} + \text{Co}(\text{CN})_6^{3-} = [\text{H}_4\text{L1}(\text{Co}(\text{CN})_6)]^+$                       | 34.19(5)              |
|                                                                                                                                 |                       |
| $\text{H}^+ + \text{L1} + \text{Fe}(\text{CN})_6^{4-} = [\text{HL1}(\text{Fe}(\text{CN})_6)]^{3-}$                              | 13.41(5)              |
| $2\text{H}^+ + \text{L1} + \text{Fe}(\text{CN})_6^{4-} = [\text{H}_2\text{L1}(\text{Fe}(\text{CN})_6)]^{2-}$                    | 23.04(6)              |
| $3\text{H}^+ + \text{L1} + \text{Fe}(\text{CN})_6^{4-} = [\text{H}_3\text{L1}(\text{Fe}(\text{CN})_6)]^-$                       | 32.00(7)              |
| $4\text{H}^+ + \text{L1} + \text{Fe}(\text{CN})_6^{4-} = [\text{H}_4\text{L1}(\text{Fe}(\text{CN})_6)]$                         | 34.78(5)              |
|                                                                                                                                 |                       |
| $2\text{H}^+ + \text{L1} + \text{Au}(\text{S}_2\text{O}_3)_2^{3-} = [\text{H}_2\text{L1}(\text{Au}(\text{S}_2\text{O}_3)_2)]^-$ | 21.85(4)              |
| $3\text{H}^+ + \text{L1} + \text{Au}(\text{S}_2\text{O}_3)_2^{3-} = [\text{H}_3\text{L1}(\text{Au}(\text{S}_2\text{O}_3)_2)]$   | 30.48(6)              |
| $4\text{H}^+ + \text{L1} + \text{Au}(\text{S}_2\text{O}_3)_2^{3-} = [\text{H}_4\text{L1}(\text{Au}(\text{S}_2\text{O}_3)_2)]^+$ | 31.97(5)              |

<sup>a</sup> Values in parentheses are standard deviations on the last significant figures.
